# Supplementary material for: Molecular landscape and efficacy of HER2-targeted therapy in patients with HER2-mutated metastatic breast cancer
Source: PubMed Central journal article supplement (PMC7603305; doi:10.1038/s41523-020-00201-9), 2020-10-30
Supplement: 41523_2020_201_MOESM1_ESM.pdf [file 41523_2020_201_MOESM1_ESM.pdf]

**Supplementary Table 1** Cox regression analyses of PFS for patients treated with first line trastuzumab

| Variable                                      | Univariate analysis |          | Multivariable analysis |          |
|-----------------------------------------------|---------------------|----------|------------------------|----------|
|                                               | HR (95% CI)         | <i>P</i> | HR (95% CI)            | <i>P</i> |
| Sites of metastasis (as continuous variable)  | 0.99 (0.80 to 1.24) | 0.935    |                        |          |
| TP53 status, wild type vs mutant type         | 1.14 (0.59 to 2.18) | 0.700    |                        |          |
| PIK3CA status, wild type vs mutant type       | 0.93 (0.46 to 1.90) | 0.847    |                        |          |
| PI3K pathway status, wild type vs mutant type | 0.87 (0.36 to 2.11) | 0.760    |                        |          |
| Hormone status, negative versus positive      | 2.59 (1.30 to 5.16) | 0.007    | 2.64 (1.31 to 5.31)    | 0.007    |
| HER2 status, wild type vs mutant type         | 2.59 (1.24 to 5.39) | 0.011    | 2.65 (1.25 to 5.65)    | 0.011    |

**Abbreviations:** PFS: Progression-free survival. HR: hazard ratio. HER2: Human epidermal growth factor receptor 2.

**Supplementary Table 2** Characteristics of the 10 patients who received pyrotinib

| Patient ID | Age | Histology | Number of metastatic sites | Visceral metastases | Number of chemotherapy line | Number of endocrine therapy line | Previous anti-cancer therapy line | Previous anti-HER2 therapy | Hormone receptor status | Best response achieved | Disease progression | PFS (months) | HER2 mutation    |
|------------|-----|-----------|----------------------------|---------------------|-----------------------------|----------------------------------|-----------------------------------|----------------------------|-------------------------|------------------------|---------------------|--------------|------------------|
| 03         | 51  | IDC       | 1                          | No                  | 1                           | 3                                | 4                                 | Yes                        | Positive                | SD                     | 1                   | 15.5         | p.S310F, p.D769Y |
| 05         | 55  | IDC       | 3                          | No                  | 2                           | 1                                | 3                                 | Yes                        | Positive                | PR                     | 1                   | 4.9          | p.L755S          |
| 06         | 54  | IDC       | 5                          | Yes                 | 4                           | 2                                | 6                                 | Yes                        | Positive                | PR                     | 1                   | 5.6          | p.Y772_A775dup   |
| 07         | 66  | IDC       | 2                          | Yes                 | 5                           | 5                                | 10                                | Yes                        | Positive                | PR                     | 1                   | 4.9          | p.D769Y, p.T862A |
| 08         | 57  | IDC       | 2                          | No                  | 8                           | 1                                | 9                                 | No                         | Positive                | PD                     | 1                   | 0.7          | p.A1076T         |
| 09         | 40  | IDC       | 2                          | Yes                 | 3                           | 0                                | 3                                 | No                         | Positive                | PD                     | 1                   | 2.7          | p.Y772_A775dup   |
| 10         | 37  | IDC       | 1                          | Yes                 | 3                           | 2                                | 5                                 | No                         | Positive                | SD                     | 1                   | 4.2          | p.S310Y, p.L403V |
| 11         | 47  | IDC       | 3                          | Yes                 | 2                           | 2                                | 4                                 | No                         | Positive                | CR                     | 0                   | 15.1         | p.S310F          |
| 12         | 50  | ILC       | 1                          | Yes                 | 4                           | 1                                | 5                                 | No                         | Positive                | SD                     | 1                   | 8.2          | p.D769Y, p.V777L |
| 13         | 53  | IDC       | 2                          | No                  | 4                           | 1                                | 5                                 | No                         | Positive                | PD                     | 1                   | 1.9          | p.L767M          |

**Abbreviations:** PFS: Progression-free survival. HER2: Human epidermal growth factor receptor 2; CR, complete response; PD, progressive disease; PR, partial response; SD, stable disease.

**Supplementary Table 3** Pyrotinib-related adverse events of all grades that occurred in HER2 amplification-negative mutation-positive patients (n=13)

| Adverse event        | Any Grade |      | Grade $\geq 3$ |      |
|----------------------|-----------|------|----------------|------|
|                      | No.       | %    | No.            | %    |
| Diarrhea             | 8         | 61.5 | 2              | 15.4 |
| Vomiting             | 2         | 15.4 | 1              | 7.7  |
| Increased AST        | 2         | 15.4 | 0              | 0.0  |
| Anorexia             | 2         | 15.4 | 0              | 0.0  |
| Oral ulceration      | 1         | 7.7  | 0              | 0.0  |
| Nausea               | 1         | 7.7  | 1              | 7.7  |
| Increased Creatinine | 1         | 7.7  | 0              | 0.0  |
| Increased ALT        | 1         | 7.7  | 0              | 0.0  |
| Asthenia             | 1         | 7.7  | 0              | 0.0  |

**Abbreviations:** ALT, alanine aminotransferase; ANC, absolute neutrophil count; AST, aspartate aminotransferase; PPE, palmo-plantar erythrodysesthesia; Pyrotinib-related AEs, includes definitely related AEs and probably related AEs.

**Supplementary Table 4** List of target region genes

|          |           |        |          |          |          |        |                |          |         |
|----------|-----------|--------|----------|----------|----------|--------|----------------|----------|---------|
| ABCA10   | BRSK2     | COL5A3 | EXOC7    | HGF      | LRSAM1   | NRAS   | PRUNE          | SLC17A6  | TMPRSS2 |
| ABCA8    | BRWD3     | COL6A5 | EXTL3    | HID1     | LTBP1    | NRXN1  | PSG2           | SLC17A8  | TMTC4   |
| ABCB7    | BSG       | COL6A6 | EYA4     | HIST1H3B | LUC7L2   | NRXN2  | PSG5           | SLC25A1  | TMX3    |
| ABCC8    | BTK       | COL9A1 | EZH2     | HLA-DRB1 | LUZP4    | NT5C3L | PSIP1          | SLC25A30 | TNFAIP6 |
| ABCF2    | BTNL3     | COPA   | F8       | HLA-DRB5 | MAEL     | NTM    | PSMB1          | SLC26A3  | TNFSF4  |
| ABL1     | BTRC      | COPG1  | F9       | HMCN1    | MAGI1    | NTRK1  | PSMB5          | SLC2A2   | TNN     |
| ABL2     | C11orf30  | CPA1   | FAH      | HMHA1    | MAN2A1   | NTRK3  | PSMC4          | SLC30A5  | TNNT1   |
| ACE      | C12orf5   | CPSF3  | FAM114A2 | HNF4A    | MAP2     | NUDCD2 | PSMC6          | SLC35B2  | TNR     |
| ACER2    | C19orf38  | CPSF6  | FAM131B  | HOMER2   | MAP2K1   | NUP205 | PSTPIP1        | SLC35B4  | TNS3    |
| ACOT11   | C1orf112  | CRKL   | FAM135B  | HPS3     | MAP2K2   | NUP210 | PTBP3          | SLC38A4  | TOP1    |
| ACPP     | C1orf35   | CRTAM  | FAM13C   | HPS4     | MAP2K4   | NUTM1  | PTCD3          | SLC38A5  | TP53    |
| ACSL1    | C1QA      | CRTAP  | FAM157B  | HRAS     | MAP3K1   | NWD1   | PTCH1          | SLC43A1  | TP53BP1 |
| ACSM5    | C1S       | CRYBG3 | FAM177B  | HSPA12B  | MAP4K1   | NXF1   | PTCH2          | SLC45A1  | TPCN1   |
| ACSS3    | C20orf112 | CSF1R  | FAM21A   | HSPD1    | MAPK1    | NXF5   | PTEN           | SLC4A10  | TPH2    |
| ACTL6B   | C2orf47   | CSMD1  | FAM3A    | HYDIN    | MAPK3    | OBP2A  | PTGES3L-AARSD1 | SLC4A4   | TPMT    |
| ADAM23   | C2orf62   | CSMD3  | FAM49A   | IBSP     | MAPKAPK3 | OBP2B  | PTGS2          | SLC5A1   | TPTE    |
| ADAM33   | C7orf53   | CSN3   | FAM49B   | IDH1     | MAPRE3   | OCA2   | PTPLAD1        | SLC6A5   | TRIM33  |
| ADAMTS12 | C9orf114  | CSNK1E | FAM5C    | IDH2     | MAST1    | ODZ3   | PTPN11         | SLC8A1   | TRIM51  |
| ADAMTS16 | C9orf43   | CSPP1  | FAM86B1  | IFT172   | MBIP     | OR2T4  | PTPN13         | SLCO1B7  | TRIM58  |
| ADAMTS19 | CACNA1A   | CTCF   | FAN1     | IGF1R    | MBTPS2   | OR4A15 | PTPRA          | SLCO5A1  | TRIML1  |
| ADAMTS20 | CACNA1D   | CTIF   | FANCC    | IGSF9    | MCF2L2   | OR4C6  | PTPRD          | SMARCA4  | TRIO    |
| ADAMTS5  | CACNA1E   | CTNNA2 | FASTK    | IKBKAP   | MCL1     | OR5L2  | PTPRM          | SMARCB1  | TRIP11  |
| ADAMTSL1 | CADM2     | CTNNB1 | FAT1     | IKBKE    | MCOLN2   | OR6F1  | PYHIN1         | SMO      | TRMT112 |

|           |          |         |        |          |         |         |          |            |         |
|-----------|----------|---------|--------|----------|---------|---------|----------|------------|---------|
| ADD2      | CAMKK1   | CTSF    | FATE1  | IL11RA   | MDGA2   | OSBPL10 | QRICH2   | SMTN       | TRPC5   |
| AGMAT     | CAPRIN1  | CYP2A13 | FBN2   | IL13RA2  | MDM2    | OTOA    | RAB1B    | SNTG1      | TRUB1   |
| AGTPBP1   | CARS     | CYP3A4  | FBXW7  | IL1RAPL1 | MDM4    | OTOGL   | RAB3GAP2 | SORCS3     | TSC1    |
| AHCTF1    | CARS2    | CYP4A11 | FCGR2A | IL27RA   | MDN1    | OVCH1   | RAB6A    | SPAG16     | TSC2    |
| AK5       | CASC4    | CYTH4   | FCGR2B | IL7R     | MED12   | P4HB    | RAC2     | SPATA13    | TSGA10  |
| AKR1B10   | CASP8    | DCLK2   | FCGR3A | IMPG1    | MED23   | PABPC4  | RAF1     | SPG20      | TSKS    |
| AKR1C1    | CASP8AP2 | DCST1   | FDCSP  | INHBA    | MEFV    | PACS2   | RALBP1   | SPINT1     | TSPAN12 |
| AKT1      | CASQ2    | DDB1    | FGFR1  | INPP4B   | MET     | PAEP    | RAPGEF2  | SPPL2A     | TSR2    |
| AKT2      | CATSPER2 | DDR1    | FGFR2  | INPP5J   | METTL14 | PAGE1   | RARA     | SPPL3      | TTF2    |
| AKT3      | CBFB     | DDR2    | FGFR3  | IQCA1    | METTL5  | PALB2   | RARB     | SPRED1     | TTN     |
| ALDH1A3   | CBL      | DDX24   | FGFR4  | IRS2     | MGAM    | PARK2   | RASEF    | SPTA1      | TUBA3C  |
| ALDH2     | CBX4     | DDX3X   | FLCN   | ITFG2    | MICALL1 | PARP4   | RB1      | SRC        | TUBGCP4 |
| ALG5      | CCDC155  | DEPDC4  | FLNC   | ITGA8    | MID1    | PCK2    | RBM6     | SRRT       | TUBGCP5 |
| ALK       | CCDC159  | DGKK    | FLOT2  | ITGA9    | MIER2   | PCLO    | RBMX     | SSBP3      | TYK2    |
| ALX4      | CCDC17   | DHCR24  | FLT1   | ITIH1    | MITF    | PCNT    | RCC1     | SSH2       | TYRP1   |
| AMOT      | CCND1    | DHDDS   | FLT3   | ITLN2    | MLH1    | PCNXL2  | REC8     | SSPO       | U2AF1   |
| ANK2      | CCND2    | DHX9    | FLT3LG | ITM2A    | MLH3    | PCSK5   | REG1B    | ST18       | U2AF2   |
| ANKRD13D  | CCND3    | DIAPH1  | FLT4   | ITPKB    | MLL3    | PCYT1A  | RELN     | ST6GALNAC1 | UBASH3A |
| ANKRD20A4 | CCNE1    | DKC1    | FMN2   | ITPR1    | MLPH    | PDCD6   | RERE     | STAG2      | UBE2Q1  |
| ANKRD27   | CCT3     | DLST    | FMNL3  | JAK1     | MORC1   | PDE1C   | RET      | STAT1      | UBE4B   |
| ANKRD28   | CCT6B    | DMD     | FNDC4  | JAK2     | MORN1   | PDE2A   | RFWD2    | STAT3      | UCHL3   |
| ANKRD30A  | CD1E     | DMXL1   | FNIP2  | JAK3     | MPL     | PDE4DIP | RFX3     | STAT4      | UCK2    |
| ANKRD30B  | CD274    | DMXL2   | FOLH1  | KCNAB2   | MRPL1   | PDGFRA  | RHEB     | STAT6      | UGT8    |
| ANKRD36B  | CD300LF  | DNAH10  | FOXA1  | KCNH6    | MRPL24  | PDGFRB  | RHOA     | STK11      | ULK3    |
| ANO2      | CD5L     | DNAH5   | FOXJ2  | KCNQ2    | MRPS18B | PDIA5   | RICTOR   | STK11IP    | UMOD    |

|            |          |         |         |           |        |         |         |         |        |
|------------|----------|---------|---------|-----------|--------|---------|---------|---------|--------|
| AP1B1      | CD9      | DNAH9   | FOXL2   | KDM4A     | MS4A1  | PDILT   | RNF215  | STK31   | UNC13A |
| AP1G2      | CD97     | DNAJC11 | FRG1    | KDM6A     | MSH2   | PDK1    | RNF219  | STX3    | UNC13D |
| AP3B1      | CD99     | DNAJC9  | FRG2B   | KDR       | MSH3   | PDRG1   | RNF43   | SULT1A4 | UNC5D  |
| APAF1      | CDH1     | DNMT3A  | FRMD4A  | KEAP1     | MSH6   | PEX6    | ROCK1   | SUPT5H  | USP12  |
| APC        | CDH18    | DNTTIP1 | FRMPD2  | KIAA0195  | MSI1   | PGAP1   | ROS1    | SUPT6H  | USP34  |
| APLP2      | CDH24    | DOCK11  | FRMPD4  | KIAA0226  | MTA2   | PHACTR3 | RPL22   | SYCP2L  | USP39  |
| APMAP      | CDH26    | DOCK3   | FSD2    | KIAA0319  | MTM1   | PHF20L1 | RPL36A  | SYK     | USP45  |
| APPL2      | CDK11A   | DOT1L   | FSHR    | KIAA0922  | MTOR   | PHYH    | RPS5    | SYNE1   | USP48  |
| AQP12A     | CDK12    | DPP10   | FUBP1   | KIAA1191  | MTR    | PI4KB   | RPS6KA1 | SYNE2   | VAV1   |
| AR         | CDK13    | DPP4    | FUNDC1  | KIAA1199  | MTTP   | PIK3CA  | RPS6KB1 | SYNJ2   | VEGFA  |
| ARAF       | CDK14    | DRGX    | GAB2    | KIAA1211L | MUC5B  | PIK3CB  | RPTOR   | TAF1B   | VEZF1  |
| ARFGAP1    | CDK18    | DUOX1   | GAB3    | KIF13A    | MUS81  | PIK3R1  | RPUSD4  | TAF6    | VHL    |
| ARFRP1     | CDK19    | DYSF    | GABRD   | KIF1B     | MYB    | PIK3R2  | RREB1   | TARBP1  | VILL   |
| ARHGAP35   | CDK4     | DZANK1  | GAD2    | KIF26B    | MYBPC2 | PIP4K2C | RRP7A   | TBC1D1  | VIT    |
| ARHGAP40   | CDK6     | ECHDC1  | GALNT13 | KIF5B     | MYC    | PIP5K1C | RUNDC3A | TBC1D21 | VPS13A |
| ARHGEF1    | CDK8     | EDN1    | GALNT14 | KIFAP3    | MYCBP2 | PIWIL1  | RUNX1   | TBC1D3  | VPS33B |
| ARHGEF7    | CDKN1A   | EEF1A1  | GATA3   | KIFC1     | MYD88  | PKD1L2  | RYR2    | TBC1D5  | VSIG4  |
| ARNTL      | CDKN1B   | EFCAB5  | GFRAL   | KIR2DL3   | MYH15  | PKHD1   | RYR3    | TBL1X   | WAS    |
| ARPC4-TTL3 | CDKN2A   | EFCAB6  | GIGYF1  | KIR3DL3   | MYH2   | PKLR    | SAFB2   | TBP     | WASL   |
| ASH2L      | CDKN2B   | EFCAB7  | GINS4   | KIT       | MYH4   | PLAC8   | SAG     | TBX15   | WDR44  |
| ASTN1      | CDS1     | EFHA2   | GIPR    | KLHL1     | MYH8   | PLCB4   | SAGE1   | TBX22   | WDR52  |
| ASXL2      | CEACAM20 | EFNA5   | GKN2    | KLHL14    | MYH9   | PLCZ1   | SAMD8   | TBX3    | WDR62  |
| ATAD2B     | CECR2    | EGFR    | GLB1L3  | KLK1      | MYL5   | PLEC    | SCN10A  | TCF20   | WDR66  |
| ATG9B      | CELA2B   | EIF1AX  | GLYR1   | KMT2B     | MYL6   | PLK2    | SCN3A   | TCF4    | WDR72  |
| ATM        | CGN      | EIF2B5  | GMDS    | KMT2C     | MYLK2  | PLOD3   | SCN7A   | TCP10   | WDC1   |

|          |          |           |         |          |        |           |          |          |         |
|----------|----------|-----------|---------|----------|--------|-----------|----------|----------|---------|
| ATP10B   | CHD3     | EIF2C2    | GNA11   | KRAS     | MYO3A  | PLXNA1    | SCN9A    | TCP11    | WLS     |
| ATP10D   | CHD4     | EIF3E     | GNAQ    | KRT2     | MYOM1  | PMS1      | SDK2     | TEK      | WSCD2   |
| ATP12A   | CHD6     | EIF3I     | GNAS    | KRT9     | NACAD  | PMS2      | SEC14L4  | TERT     | WWP2    |
| ATP2C1   | CHEK1    | EIF4ENIF1 | GNPTAB  | KRTAP5-5 | NARF   | POLDIP2   | SEC24B   | TESC     | XBP1    |
| ATP6V0A2 | CHEK2    | EIF4H     | GOLGA4  | KTN1     | NAT10  | POLE      | SEH1L    | TEX35    | XPO1    |
| ATP8B2   | CHI3L1   | ELAVL3    | GPAT2   | L3MBTL1  | NAV3   | POLR2J    | SELP     | TFDP1    | XPO4    |
| ATR      | CISD3    | ELL3      | GPATCH2 | LARP1    | NBPF1  | POLR3B    | SEMA6A   | TGDS     | XPO5    |
| ATXN2    | CLCN7    | EMID2     | GPR114  | LCN10    | NBPF10 | POLR3GL   | SEPT12.  | TGM2     | XRCC1   |
| ATXN7L2  | CLEC16A  | ENPP2     | GPR125  | LCT      | NCF2   | POLRMT    | SERPINA7 | TGM5     | ZAP70   |
| AURKA    | CLINT1   | ENTPD6    | GPR133  | LCTL     | NCKAP1 | POM121L12 | SETD1B   | THBS2    | ZBTB80S |
| AURKB    | CNGB3    | EPB41L2   | GPR144  | LETM1    | NCOR1  | POTEG     | SETD2    | THEM5    | ZC3H13  |
| AXL      | CNKSR2   | EPB41L4B  | GPS2    | LGALS13  | NCOR2  | PPA1      | SF1      | THOC1    | ZC3H7B  |
| BAP1     | CNOT3    | EPHA2     | GRIA3   | LILRB3   | NEK5   | PPDPF     | SF3B1    | THSD7A   | ZDHHC11 |
| BAX      | CNOT4    | EPHA3     | GRIK2   | LILRB4   | NELL1  | PPEF1     | SF3B14   | THSD7B   | ZFC3H1  |
| BBS9     | CNTN1    | EPHA5     | GUCY1A3 | LIPN     | NF1    | PPFIBP2   | SF3B3    | TIMD4    | ZFR     |
| BCAS1    | CNTN4    | EPHB1     | GUCY2C  | LMAN1L   | NF2    | PPIL2     | SGCZ     | TIMM44   | ZMYM4   |
| BCAS2    | CNTN5    | EPS8L3    | GYLTL1B | LMBR1L   | NFE2L2 | PPP1R17   | SGIP1    | TIMP3    | ZNF143  |
| BCL2     | CNTNAP3B | ERBB2     | HAAO    | LPCAT4   | NIPBL  | PPP4R4    | SGK1     | TJP3     | ZNF350  |
| BCL2L11  | CNTNAP5  | ERBB3     | HAP1    | LPHN3    | NLGN3  | PQBP1     | SGPL1    | TLE1     | ZNF385A |
| BCR      | COASY    | ERBB4     | HAUS5   | LRBA     | NLRC3  | PREB      | SH2D3A   | TLL1     | ZNF414  |
| BLOC1S1  | COL14A1  | ERCC1     | HAUS6   | LRP1B    | NLRP4  | PREX2     | SH3BGR   | TMC2     | ZNF512B |
| BMPR1B   | COL16A1  | ERG       | HCN1    | LRP2     | NMI    | PRKAA1    | SH3PXD2A | TMED8    | ZNF541  |
| BRAF     | COL19A1  | ESD       | HDAC1   | LRP4     | NOP2   | PRKACA    | SHISA4   | TMEM104  | ZNF563  |
| BRCA1    | COL1A1   | ESR1      | HDAC4   | LRRC16B  | NOS1   | PRKAG3    | SI       | TMEM120B | ZNF614  |
| BRCA2    | COL25A1  | ETNK2     | HDAC6   | LRRC2    | NOS2   | PRKCD     | SIDT2    | TMEM132D | ZNF687  |





**Supplementary Data 1.** Somatic mutations identified in 1184 patients. (separate .xlsx file)
